# Supplementary material for: Monocyte and macrophage differentiation: circulation inflammatory monocyte as biomarker for inflammatory diseases
Source: Springer Nature journal article supplement (doi:10.1186/2050-7771-2-1), 2014-01-07
Supplement: 40364_2013_33_MOESM3_ESM.pdf [file 40364_2013_33_MOESM3_ESM.pdf]

| Disease       | CD14 <sup>++</sup> CD16 <sup>-</sup><br>(classical,<br>phagocytic) | CD14 <sup>++</sup> CD16 <sup>+</sup><br>(Intermediate,<br>inflammatory) | CD14 <sup>+</sup> CD16 <sup>++</sup><br>(Non-classical,<br>patrolling) | Functional change associated<br>with CD14 <sup>++</sup> CD16 <sup>-</sup> MC expansion | PMID #   |
|---------------|--------------------------------------------------------------------|-------------------------------------------------------------------------|------------------------------------------------------------------------|----------------------------------------------------------------------------------------|----------|
| Congestive HF |                                                                    | 6.4%↑                                                                   |                                                                        | CD143 (ACE) ↑, Creatine↑,<br>GFR↓, albumin↓                                            | 20364047 |
| CKD           |                                                                    | 42 →70 cells/μl                                                         | 55 →130 cells/μl                                                       |                                                                                        | 20943670 |
| RA            |                                                                    | 5 %↑                                                                    |                                                                        | Th17 cells expansion                                                                   | 22006178 |
| AAA           |                                                                    | 2.24 %↑                                                                 | 1.9 %↑                                                                 |                                                                                        | 23348634 |
| Stroke        |                                                                    | 3 %↑                                                                    | 3 %↓                                                                   |                                                                                        | 19293821 |
| HIV-2         |                                                                    | 7 %↑                                                                    |                                                                        | Myeloid dendritic cell depletion                                                       | 23460749 |
| Sepsis        | No change                                                          | 11.5 %↑                                                                 | 6 %↑                                                                   | Phagocytosis↓, CD86↑, HLA-DR↓,<br>IL1β↓, IL-10↑                                        | 12028567 |
| Sepsis        | 9.5 %↓                                                             | 12 %↑                                                                   | 3.4 %↓                                                                 | HLA-DR↓, TNFα & IL1β ↓,IL-10↑                                                          | 19604380 |
| Hepatitis B   | 6.2 %↓                                                             | 3.3 %↑                                                                  | 2.5 %↑                                                                 | HLA-DR↑,TNFα↑, IL-6↑, IL1β ↑,<br>Th17 cells expansion                                  | 21390263 |
| HIV           | 2.5 %↓                                                             | 3 %↑                                                                    | 3 %↑                                                                   | CD163(scavenger receptor)↑                                                             | 21625498 |
| Denque fever  | 12~18 %↓                                                           | 3~7 %↑                                                                  |                                                                        | HLA-DR↓, ICAM ↑,<br>serum TNFα↑, IL-18↑, IFNγ ↑,                                       | 20113369 |
| Tuberculosis  | 10 %↓                                                              | 9 %↑                                                                    | 13 %↑                                                                  | TNFα↑, apoptosis↑, IL-10↓                                                              | 21621464 |

**Table 3. Frequency of three monocyte subsets in different diseases.** Circulating classical (CD14<sup>++</sup>CD16<sup>-</sup>; also described as CD14<sup>+</sup>CD16<sup>-</sup>; phagocytic), intermediate (CD14<sup>++</sup>CD16<sup>+</sup>, also described as CD14<sup>+</sup>CD16<sup>+</sup>; inflammatory) and non-classical (CD14<sup>+</sup>CD16<sup>++</sup>, also described as CD14<sup>dim</sup>CD16<sup>+</sup>; patrolling) MC counts were examined in human disease as indicated. The percentage change of monocyte subsets and some functional measurements are recorded. We used PMID # to cite individual manuscripts reporting these studies. ACE, angiotensin converting factor; GFR, glomerular filtration rate; CD86, co-stimulatory molecule, HLA-DR, human leukocyte antigen DR (MHC-II, major histocompatibility complex class II); RA, rheumatoid arthritis; AAA, abdominal aortic aneurysms; HF, heart failure; CKD, chronic kidney disease; GFR, glomerular filtration rate; HIV, human immunodeficiency virus.
