# Supplementary material for: Monocyte and macrophage differentiation: circulation inflammatory monocyte as biomarker for inflammatory diseases
Source: Springer Nature journal article supplement (doi:10.1186/2050-7771-2-1), 2014-01-07
Supplement: 40364_2013_33_MOESM4_ESM.pdf [file 40364_2013_33_MOESM4_ESM.pdf]

| Species | Subsets                                     | Surface Markers                                              | % in MNC | Chemokine receptors                                          | Functions                          |
|---------|---------------------------------------------|--------------------------------------------------------------|----------|--------------------------------------------------------------|------------------------------------|
| Human   | Classical                                   | CD14 <sup>++</sup> CD16 <sup>-</sup>                         | 80-95    | CCR2 <sup>high</sup> CX3CR1 <sup>low</sup>                   | Phagocytosis                       |
|         | Intermediate                                | CD14 <sup>++</sup> CD16 <sup>+</sup>                         | 2-11     | CCR2 <sup>mid</sup> CX3CR1 <sup>high</sup> CCR5 <sup>+</sup> | Pro-inflammatory                   |
|         | Non-classical                               | CD14 <sup>+</sup> CD16 <sup>++</sup>                         | 2-8      | CCR2 <sup>low</sup> CX3CR1 <sup>high</sup>                   | Patrolling                         |
| Mouse   | Ly6C <sup>high</sup> (Ly6C <sup>+</sup> )   | CD11b <sup>+</sup> CD115 <sup>+</sup> Ly6C <sup>high</sup>   | 40-45    | CCR2 <sup>high</sup> CX3CR1 <sup>low</sup>                   | Phagocytosis &<br>Pro-inflammatory |
|         | Ly6C <sup>middle</sup> (Ly6C <sup>+</sup> ) | CD11b <sup>+</sup> CD115 <sup>+</sup> Ly6C <sup>middle</sup> | 5-32     | CCR2 <sup>high</sup> CX3CR1 <sup>low</sup>                   | Pro-inflammatory                   |
|         | Ly6C <sup>low</sup> (Ly6C <sup>-</sup> )    | CD11b <sup>+</sup> CD115 <sup>+</sup> Ly6C <sup>low</sup>    | 26-50    | CCR2 <sup>low</sup> CX3CR1 <sup>high</sup>                   | Patrolling; tissue repair          |

**Table 4. Markers and functions of MC subsets in human and mouse.** Human MCs are divided into three subsets based on the cell surface expression of CD14 and CD16. CD14<sup>++</sup>CD16<sup>-</sup> MCs, also called the classical MC, are the most prevalent MC subset in human blood and express high level of CCR2. The CD14<sup>++</sup>CD16<sup>+</sup> MCs are intermediate MC which contribute significantly to atherosclerosis. The CD14<sup>+</sup>CD16<sup>++</sup> MCs are referred to as non-classical monocytes which perform a *in vivo* patrolling function. Mouse MCs are divided into two subsets based on their cell surface expression of Ly6C. The Ly6C<sup>high</sup> and Ly6C<sup>middle</sup> subsets perform pro-inflammatory functions and express high level of CCR2, which is considered the counterpart of human classical MCs. The Ly6C<sup>low</sup> subsets express low level of CCR2, majorly patrol along the vascular endothelium and are involved in tissue repair, functionally similar to human non-classical MCs. CD, cluster of differentiation; CCR2, chemokine (C-C motif) receptor 2; CX3CR1, CX3C chemokine receptor 1; Ly6C, lymphocyte antigen 6 complex.
