# Supplementary material for: Monocyte and macrophage differentiation: circulation inflammatory monocyte as biomarker for inflammatory diseases
Source: Springer Nature journal article supplement (doi:10.1186/2050-7771-2-1), 2014-01-07
Supplement: 40364_2013_33_MOESM5_ESM.pdf [file 40364_2013_33_MOESM5_ESM.pdf]

| <b>Disease</b> | <b>Group comparison</b>          | <b>Monocyte counts comparison</b>                                                   | <b>PMID #</b> |
|----------------|----------------------------------|-------------------------------------------------------------------------------------|---------------|
| CVD            | HDL, 2nmol/L vs. <1nmol/L        | 3.65 x 10 <sup>8</sup> vs. 4.5x10 <sup>8</sup> cells/dL                             | 18629357      |
| AMI            | CT vs. AMI                       | 4.97 x 10 <sup>8</sup> vs. 7.93 x10 <sup>8</sup> cells/dL                           | 23455782      |
| AMI            | 5h AMI vs. 1-2 day AMI           | 4.56 x 10 <sup>8</sup> vs. 7.11 x10 <sup>8</sup> cells/dL                           | 11788214      |
|                | None vs. Pump failure            | 6.05 x 10 <sup>8</sup> vs. 9.41 x10 <sup>8</sup> cells/dL                           |               |
|                | None vs. LV aneurysm             | 6.82 x 10 <sup>8</sup> vs. 8.61 x10 <sup>8</sup> cells/dL                           |               |
| CKD            | CKD without CVD vs. CKD with CVD | 6.97 x 10 <sup>8</sup> vs. 5.71 x10 <sup>8</sup> cells/dL                           | 18160960      |
| AMI            | LVF recovery vs. LVF no recovery | 6.42 x 10 <sup>8</sup> vs. 10.13 x10 <sup>8</sup> cells/dL                          | 17652884      |
| CAD            | Healthy vs. CAD vs. AMI          | 5.17 x 10 <sup>8</sup> vs. 5.42 x10 <sup>8</sup> vs. 6.72 x10 <sup>8</sup> cells/dL | 16612453      |

**Table 1. Monocytosis in human disease.** Circulating total MC counts were examined in human disease as indicated. Comparisons were made between described groups in CVD, and MC counts. We used PMID # to cite individual manuscripts reporting these studies. AMI, acute myocardial infarction; CAD, coronary arterial disease; CKD, chronic kidney disease; CK, creatine kinase; CRP, C-reactive protein; CVD, cardiovascular disease; LVF, left ventricular failure. PMID, PubMed Identification.
