# Supplementary figures and images for: Monocyte and macrophage differentiation: circulation inflammatory monocyte as biomarker for inflammatory diseases
Source: Springer Nature journal article supplement (doi:10.1186/2050-7771-2-1), 2014-01-07

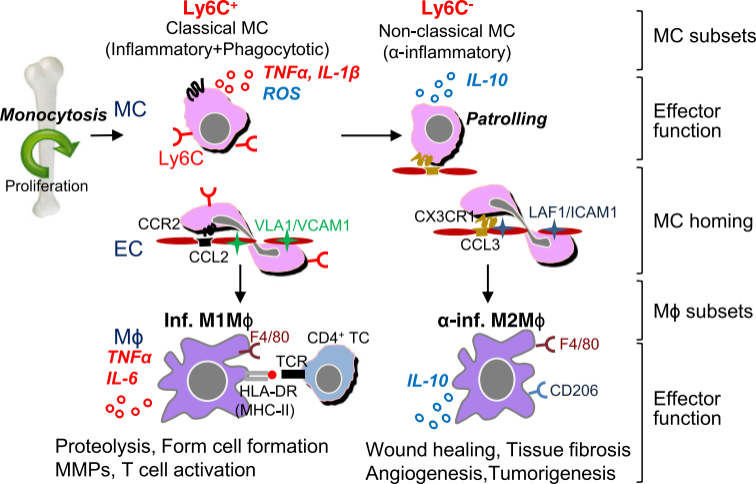

Supplement: 40364_2013_33_MOESM1_ESM.pdf [file 40364_2013_33_MOESM1_ESM.pdf]

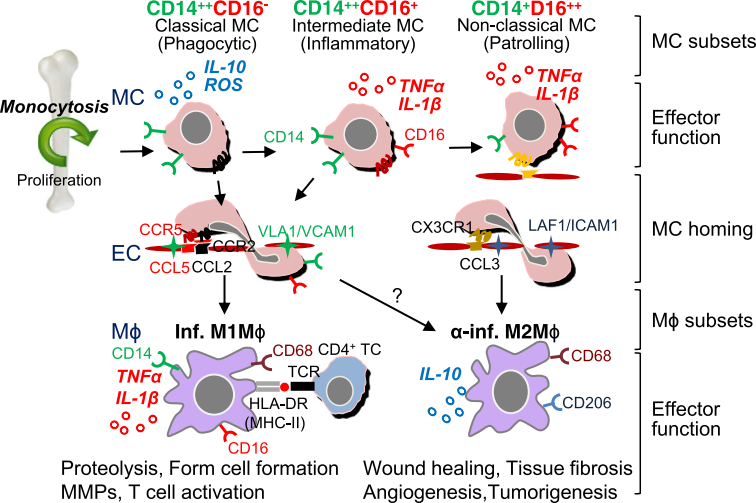

Supplement: 40364_2013_33_MOESM2_ESM.pdf [file 40364_2013_33_MOESM2_ESM.pdf]
